# Supplementary material
Source: Springer Nature journal article supplement (https://www.springermedizin.de/resource/supplementary/12916_2006_125_MOESM4_ESM.pdf/9599220)
Supplement: MOESM4 [file 9599220]

|                              | 1.0<br>Identify | 2.0<br>Report | 3.0<br>Analyze and<br>Interpret | 4.0<br>Investigate | 5.0<br>Respond | 6.0<br>Provide<br>Feedback | 7.0<br>Evaluate |
|------------------------------|-----------------|---------------|---------------------------------|--------------------|----------------|----------------------------|-----------------|
| Community                    |                 |               |                                 |                    |                |                            |                 |
| Health Facility              |                 |               |                                 |                    |                |                            |                 |
| District, State,<br>Province |                 |               |                                 |                    |                |                            |                 |
| National                     |                 |               |                                 |                    |                |                            |                 |
| WHO                          |                 |               |                                 |                    |                |                            |                 |
